# Supplementary material for: Retention of single crystals of two Co(ii) complexes during chemical reactions and rearrangement
Source: Royal Society of Chemistry journal article supplement (doi:10.1039/c4dt01312c), 2014-07-02
Supplement: c4dt01312c1.pdf [file c4dt01312c1.pdf]

## **Electronic Supplementary Information**

# **Retention of Single Crystals of Two Co(II) Complexes During Chemical Reactions and Rearrangement**

**Shaikh M. Mobin\* and Akbar Mohammad**

Discipline of Chemistry, School of Basic Sciences, Indian Institute of Technology Indore,  
Khandwa Road, Indore 452017, India. Tel: +91 731 2438 762; E-mail: [xray@iiti.ac.in](mailto:xray@iiti.ac.in)

**Table S1. Selected Bond Lengths (Å) and Bond Angles (°) for all complexes**

| <b>Selected Bond Distance (Å) for [1]SO<sub>4</sub></b> |            |
|---------------------------------------------------------|------------|
| Co(1)-O(1)                                              | 2.063(3)   |
| Co(1)-O(5)                                              | 2.074(2)   |
| Co(1)-O(4)                                              | 2.106(3)   |
| Co(1)-O(3)                                              | 2.113(3)   |
| Co(1)-N(1)                                              | 2.123(2)   |
| Co(1)-O(2)                                              | 2.131(3)   |
| <b>Selected Bond Angles (°) for [1]SO<sub>4</sub></b>   |            |
| O(1)-Co(1)-O(5)                                         | 90.29(12)  |
| O(1)-Co(1)-O(4)                                         | 91.52(12)  |
| O(5)-Co(1)-O(4)                                         | 87.78(11)  |
| O(1)-Co(1)-O(3)                                         | 176.89(13) |
| O(5)-Co(1)-O(3)                                         | 91.33(11)  |
| O(4)-Co(1)-O(3)                                         | 91.19(9)   |
| O(1)-Co(1)-N(1)                                         | 87.84(12)  |
| O(5)-Co(1)-N(1)                                         | 177.17(15) |
| O(4)-Co(1)-N(1)                                         | 90.15(12)  |
| O(3)-Co(1)-N(1)                                         | 90.64(11)  |
| O(1)-Co(1)-O(2)                                         | 92.16(11)  |
| O(5)-Co(1)-O(2)                                         | 87.16(11)  |
| O(4)-Co(1)-O(2)                                         | 173.76(11) |
| O(3)-Co(1)-O(2)                                         | 85.28(11)  |
| N(1)-Co(1)-O(2)                                         | 95.03(12)  |
| <b>Selected Bond Distance (Å) for 3</b>                 |            |
| Co(1)-O(6)#1                                            | 2.080(5)   |

|                                                                                |           |
|--------------------------------------------------------------------------------|-----------|
| Co(1)-O(2)                                                                     | 2.106(6)  |
| Co(1)-O(4)                                                                     | 2.108(6)  |
| Co(1)-O(3)                                                                     | 2.111(5)  |
| Co(1)-O(1)                                                                     | 2.113(5)  |
| Co(1)-N(1)                                                                     | 2.132(6)  |
| <b>Selected Bond Angles (°) for 3</b>                                          |           |
| O(6)#1-Co(1)-O(2)                                                              | 83.8(2)   |
| O(6)#1-Co(1)-O(4)                                                              | 90.6(2)   |
| O(2)-Co(1)-O(4)                                                                | 174.2(2)  |
| O(6)#1-Co(1)-O(3)                                                              | 93.11(19) |
| O(2)-Co(1)-O(3)                                                                | 87.7(2)   |
| O(4)-Co(1)-O(3)                                                                | 91.2(2)   |
| O(6)#1-Co(1)-O(1)                                                              | 175.0(2)  |
| O(2)-Co(1)-O(1)                                                                | 93.3(2)   |
| O(4)-Co(1)-O(1)                                                                | 92.2(2)   |
| O(3)-Co(1)-O(1)                                                                | 82.70(19) |
| O(6)#1-Co(1)-N(1)                                                              | 94.1(2)   |
| O(2)-Co(1)-N(1)                                                                | 87.9(2)   |
| O(4)-Co(1)-N(1)                                                                | 94.0(2)   |
| O(3)-Co(1)-N(1)                                                                | 171.0(2)  |
| O(1)-Co(1)-N(1)                                                                | 89.8(2)   |
| Symmetry transformations used to generate equivalent atoms:#1 -<br>x+1,-y,-z+2 |           |
| <b>Selected Bond Distance (Å) for [5]SO<sub>4</sub></b>                        |           |
| Co(2)-O(10)#1                                                                  | 2.052(3)  |
| Co(2)-O(10)                                                                    | 2.052(3)  |

|                                                       |            |
|-------------------------------------------------------|------------|
| Co(2)-O(8)                                            | 2.095(3)   |
| Co(2)-O(8)#1                                          | 2.095(3)   |
| Co(2)-O(9)                                            | 2.100(3)   |
| Co(2)-O(9)#1                                          | 2.100(3)   |
| Co(1)-O(2)#2                                          | 2.069(3)   |
| Co(1)-O(2)                                            | 2.069(3)   |
| Co(1)-O(1)                                            | 2.074(3)   |
| Co(1)-O(1)#2                                          | 2.074(3)   |
| Co(1)-O(3)                                            | 2.110(3)   |
| Co(1)-O(3)#2                                          | 2.110(3)   |
| <b>Selected Bond Angles (°) for [5]SO<sub>4</sub></b> |            |
| O(10)-Co(2)-O(10)#1                                   | 180.0(12)  |
| O(10)#1-Co(2)-O(8)                                    | 88.19(13)  |
| O(10)-Co(2)-O(8)                                      | 91.81(13)  |
| O(10)#1-Co(2)-O(8)#1                                  | 91.81(13)  |
| O(10)-Co(2)-O(8)#1                                    | 88.19(13)  |
| O(8)-Co(2)-O(8)#1                                     | 180.0(19)  |
| O(10)#1-Co(2)-O(9)                                    | 87.84(15)  |
| O(10)-Co(2)-O(9)                                      | 92.16(15)  |
| O(8)-Co(2)-O(9)                                       | 85.20(12)  |
| O(8)#1-Co(2)-O(9)                                     | 94.80(12)  |
| O(10)#1-Co(2)-O(9)#1                                  | 92.16(15)  |
| O(10)-Co(2)-O(9)#1                                    | 87.84(15)  |
| O(8)-Co(2)-O(9)#1                                     | 94.80(12)  |
| O(8)#1-Co(2)-O(9)#1                                   | 85.20(12)  |
| O(9)-Co(2)-O(9)#1                                     | 180.00(18) |

|                                                                                              |            |
|----------------------------------------------------------------------------------------------|------------|
| O(2)#2-Co(1)-O(2)                                                                            | 179.21(17) |
| O(2)#2-Co(1)-O(1)                                                                            | 92.70(12)  |
| O(2)-Co(1)-O(1)                                                                              | 87.85(12)  |
| O(2)#2-Co(1)-O(1)#2                                                                          | 87.85(12)  |
| O(2)-Co(1)-O(1)#2                                                                            | 92.70(12)  |
| O(1)-Co(1)-O(1)#2                                                                            | 90.46(18)  |
| O(2)#2-Co(1)-O(3)                                                                            | 92.87(12)  |
| O(2)-Co(1)-O(3)                                                                              | 86.57(13)  |
| O(1)-Co(1)-O(3)                                                                              | 89.93(12)  |
| O(1)#2-Co(1)-O(3)                                                                            | 179.17(12) |
| O(2)#2-Co(1)-O(3)#2                                                                          | 86.57(12)  |
| O(2)-Co(1)-O(3)#2                                                                            | 92.87(12)  |
| O(1)-Co(1)-O(3)#2                                                                            | 179.17(12) |
| O(1)#2-Co(1)-O(3)#2                                                                          | 89.93(12)  |
| O(3)-Co(1)-O(3)#2                                                                            | 89.70(16)  |
| Symmetry transformations used to generate equivalent atoms: #1 -<br>x,-y,-z #2 -x+1,y,-z+1/2 |            |
| <b>Selected Bond Distance (Å) for [2](NO<sub>3</sub>)<sub>2</sub></b>                        |            |
| Co(1)-O(1)                                                                                   | 2.0897(12) |
| Co(1)-O(2)                                                                                   | 2.1081(12) |
| Co(1)-N(1)                                                                                   | 2.1489(14) |
| <b>Selected Bond Angles (°) for [2](NO<sub>3</sub>)<sub>2</sub></b>                          |            |
| O(1)#1-Co(1)-O(1)                                                                            | 180.0      |
| O(1)-Co(1)-O(2)                                                                              | 89.25(5)   |
| O(1)#1-Co(1)-O(2)#1                                                                          | 89.25(5)   |
| O(1)-Co(1)-O(2)#1                                                                            | 90.75(5)   |

|                                                                                 |            |
|---------------------------------------------------------------------------------|------------|
| O(1)#1-Co(1)-O(2)                                                               | 90.75(5)   |
| O(2)#1-Co(1)-O(2)                                                               | 180.000(1) |
| O(1)#1-Co(1)-N(1)                                                               | 92.41(5)   |
| O(1)-Co(1)-N(1)                                                                 | 87.59(5)   |
| O(2)-Co(1)-N(1)                                                                 | 89.83(5)   |
| Symmetry transformations used to generate equivalent atoms: #1 -<br>x+2,-y,-z+2 |            |
| <b>Selected Bond Distance (Å) for [4]NO<sub>3</sub></b>                         |            |
| N(1)-Co(1)                                                                      | 2.076(6)   |
| N(2)-Co(1)                                                                      | 2.101(5)   |
| O(1)-Co(1)                                                                      | 2.035(5)   |
| O(2)-Co(1)                                                                      | 2.021(5)   |
| O(3)-Co(1)                                                                      | 2.139(5)   |
| O(4)-Co(1)                                                                      | 2.208(5)   |
| <b>Selected Bond Angles (°) for [4]NO<sub>3</sub></b>                           |            |
| N(1)-Co(1)-N(2)                                                                 | 175.8(3)   |
| O(1)-Co(1)-N(1)                                                                 | 89.0(2)    |
| N(3)-O(3)-Co(1)                                                                 | 92.9(5)    |
| N(3)-O(4)-Co(1)                                                                 | 90.2(5)    |
| O(2)-Co(1)-O(3)                                                                 | 95.2(2)    |
| O(3)-Co(1)-O(4)                                                                 | 59.70(19)  |
| O(1)-Co(1)-O(4)                                                                 | 108.1(2)   |
| O(2)-Co(1)-O(1)                                                                 | 97.1(2)    |
| O(1)-Co(1)-O(3)                                                                 | 167.5(2)   |
| N(1)-Co(1)-O(4)                                                                 | 87.0(2)    |
| N(1)-Co(1)-O(3)                                                                 | 92.5(2)    |

|                 |         |
|-----------------|---------|
| N(2)-Co(1)-O(3) | 90.2(2) |
| O(1)-Co(1)-N(2) | 87.7(2) |
| N(1)-Co(1)-O(4) | 87.0(2) |
| N(2)-Co(1)-O(4) | 91.5(2) |
| O(2)-Co(1)-N(1) | 92.3(2) |

**Table S2. Hydrogen Bonding [ $\text{\AA}$  and ( $^\circ$ )].**

|                              | D-H...A            | d(D-H)      | d(H...A)    | d(D...A)    | <(DHA)        |
|------------------------------|--------------------|-------------|-------------|-------------|---------------|
| <b>[1]SO<sub>4</sub></b>     |                    |             |             |             |               |
| 1                            | O3-H333...O6# (0)  | 0.857(.026) | 1.899(.029) | 2.674(.004) | 149.47( 2.38) |
| 2                            | O2-H111...O9 # (1) | 0.883(.037) | 1.892(.038) | 2.730(.004) | 157.97( 3.34) |
| 3                            | O2-H222...O8# (2)  | 0.882(.048) | 1.841(.047) | 2.709(.004) | 167.70( 4.47) |
| <b>Equivalent positions:</b> |                    |             |             |             |               |
| (0) x,y,z                    |                    |             |             |             |               |
| (1) -x,+y-1/2,-z+1           |                    |             |             |             |               |
| (2) -x,+y+1/2,-z+1           |                    |             |             |             |               |
| <b>3</b>                     |                    |             |             |             |               |
| 1                            | O1 -H101...O5#(0)  | 0.893(.084) | 1.873(.075) | 2.749(.008) | 166.23( 6.94) |
| 2                            | O2-H444...O7#(0)   | 0.895(.122) | 1.824(.126) | 2.718(.010) | 176.98( 8.82) |
| <b>Equivalent positions:</b> |                    |             |             |             |               |
| (0) -x+1,-y,-z+1             |                    |             |             |             |               |



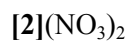

|   |                    |             |             |             |               |
|---|--------------------|-------------|-------------|-------------|---------------|
| 1 | O2-H103...O3#(0)   | 0.797(.020) | 1.984(.020) | 2.779(.002) | 174.97( 2.68) |
| 2 | O2-H102...O4 #( 1) | 0.851(36 )  | 1.909(35 )  | 2.757( 3 )  | 173.7(312)    |
| 3 | O1-H101...O5#(2)   | 0.796(30)   | 1.910(31)   | 2.703(8)    | 173.69(260)   |

**Equivalent positions:**

(0) x,y,z

(1) 3-x, -y, 2-z

(2) 3-x, 1-y, 2-z

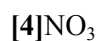

|   |                   |             |             |             |               |
|---|-------------------|-------------|-------------|-------------|---------------|
| 1 | O1-H101...O6 #(0) | 0.750(.058) | 1.949(.058) | 2.698(.008) | 176.46( 6.04) |
| 2 | O2-H102...O8#(1)  | 0.877(.070) | 1.874(.069) | 2.700(.008) | 156.43( 6.52) |
| 3 | C7-H7A...O7#(2)   | 0.990(.008) | 2.559(.005) | 3.393(.009) | 141.86( 0.46) |
| 4 | C3-H3...O7#(3)    | 0.950(.010) | 2.588(.005) | 3.526(.011) | 169.27( 0.61) |

**Equivalent positions:**

(0) x,y,z

(1) -x-1/2,+y+1/2,+z

(2) -x,+y,-z+1/2

(3) -x,+y+1,-z+1/2

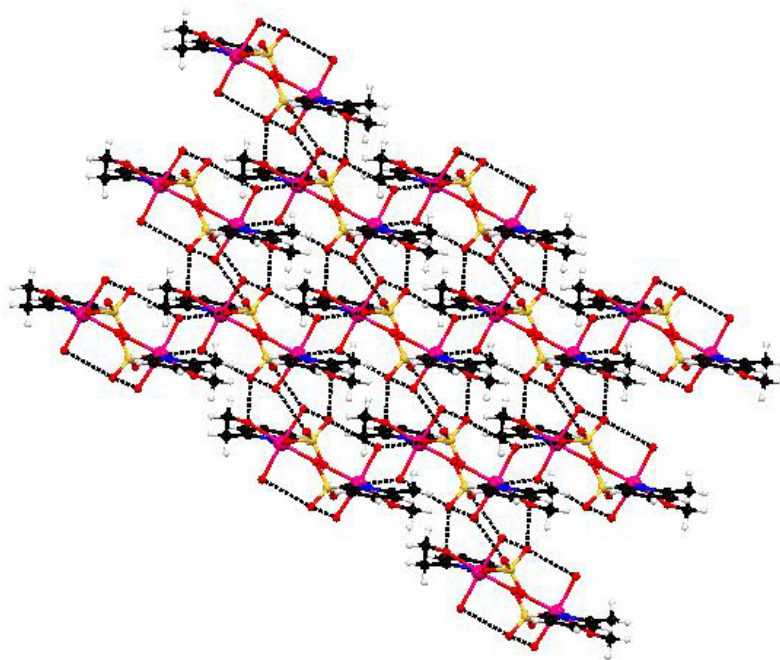

**Fig. S1** Hydrogen bonded 2D-network in **3** along the *c*-axis.

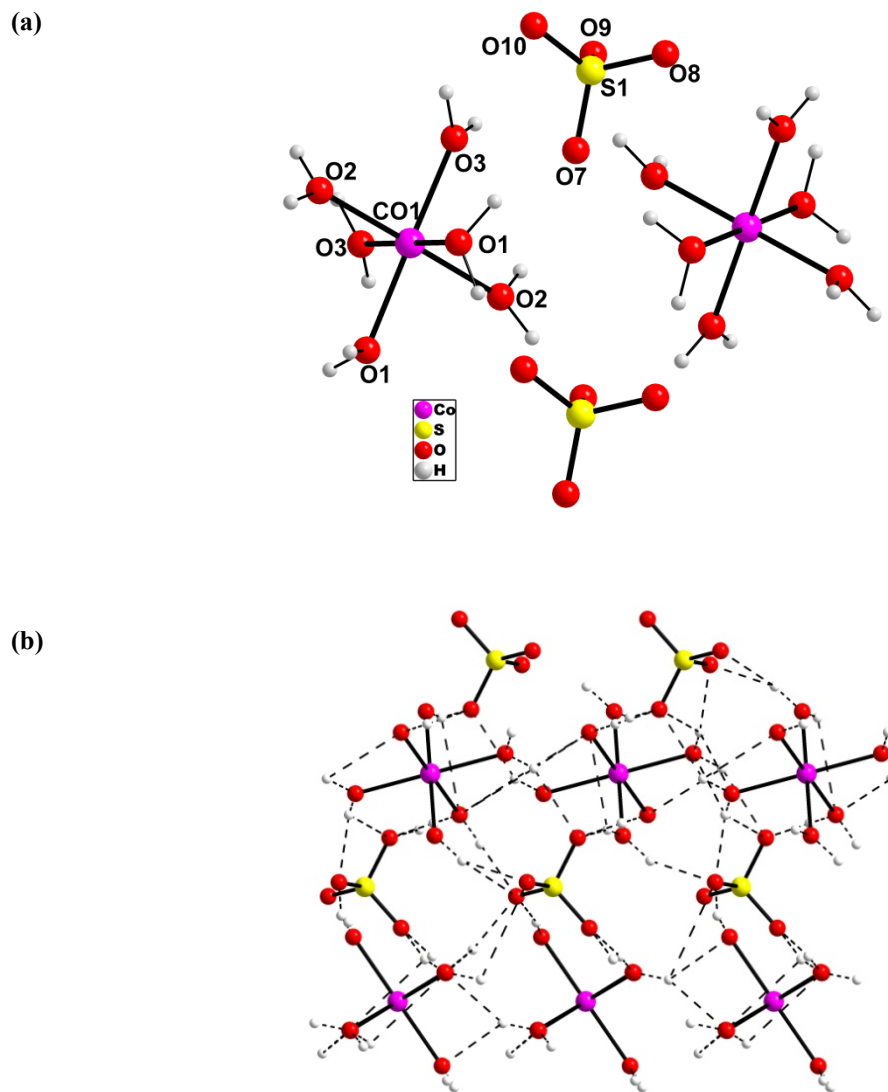

**Fig. S2 (a)** Perspective view of  $[5]SO_4$  in asymmetric unit **(b)** $[5]SO_4$  showing H-bonded network along  $b$ -axis.

$[5]SO_4$  crystallizes monoclinic  $C 2/c$  space group with crystallographically imposed inversion centre.  $Co^{II}$  ion in  $[5]SO_4$  consists of successive layers of hexa-aqua coordinated octahedral geometry as cation and independent tetrahedra sulfate ions as anion. Although the crystal structure of  $[5]SO_4$  is reported but we could not generate it by SCSC transformation of **3**. All the bond distances and angles in  $[5]SO_4$  are similar to reported (Fig. S2a and S2b).

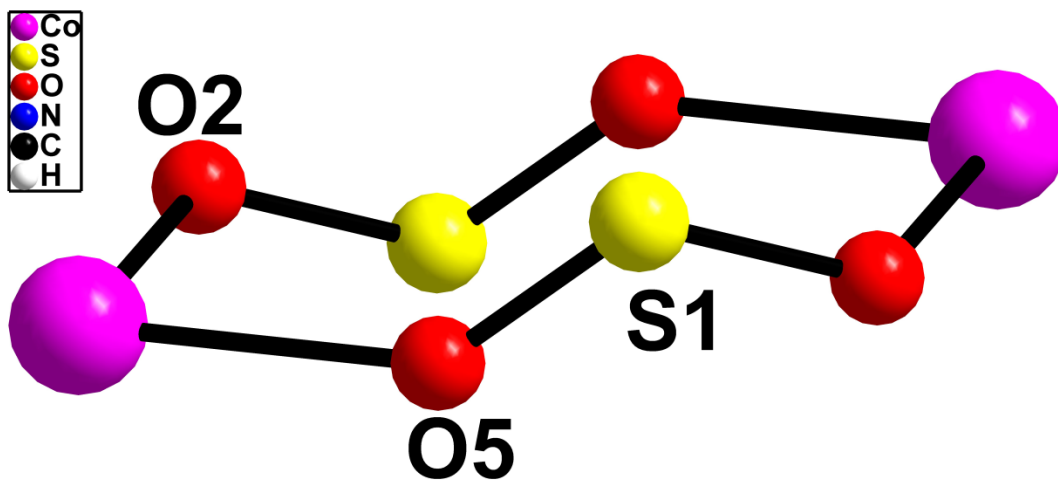

Fig. S3 8-membered metallacyclic ring in **3**.

## IR spectra

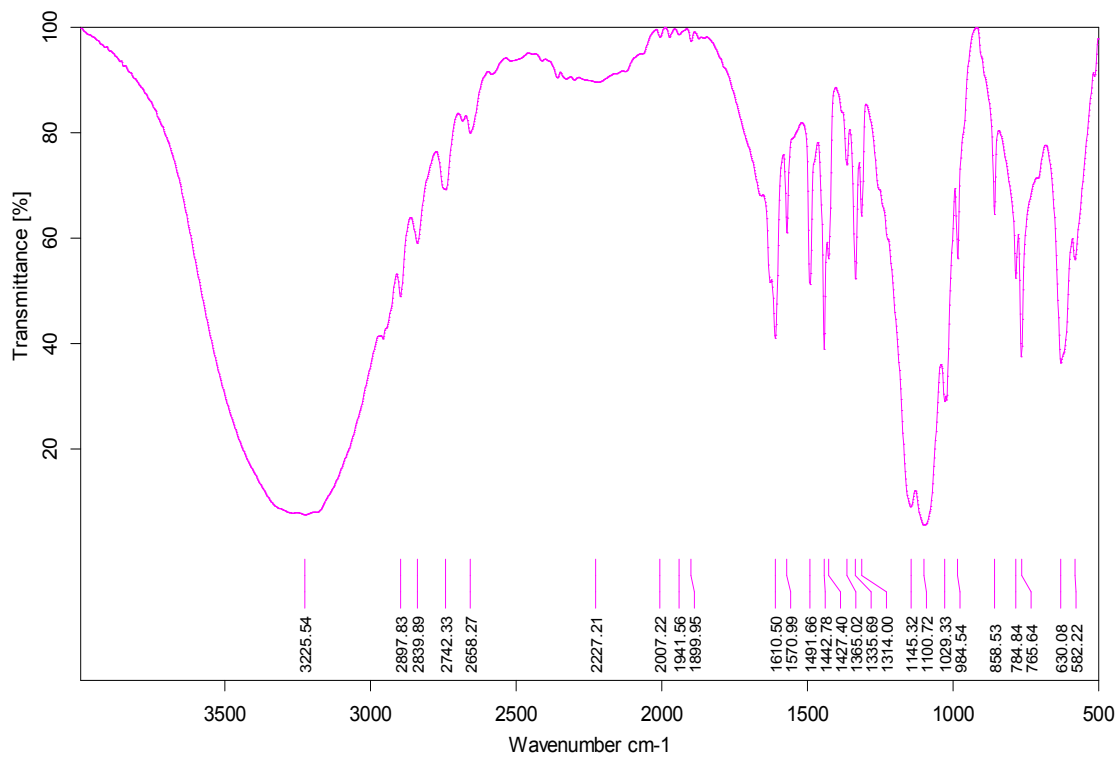

**Fig. S4** IR spectra of [1]SO<sub>4</sub> (Orange crystals) in KBr disk.

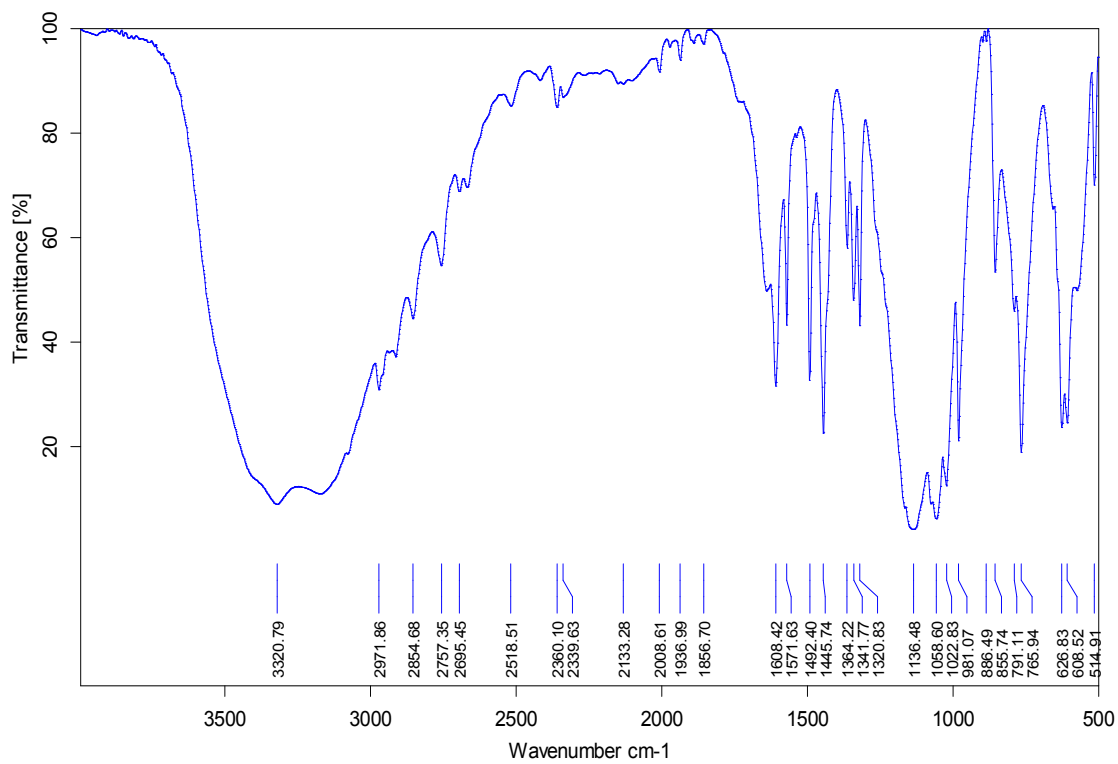

**Fig. S5** IR spectra of **3**(Pink crystals) in KBr disk.

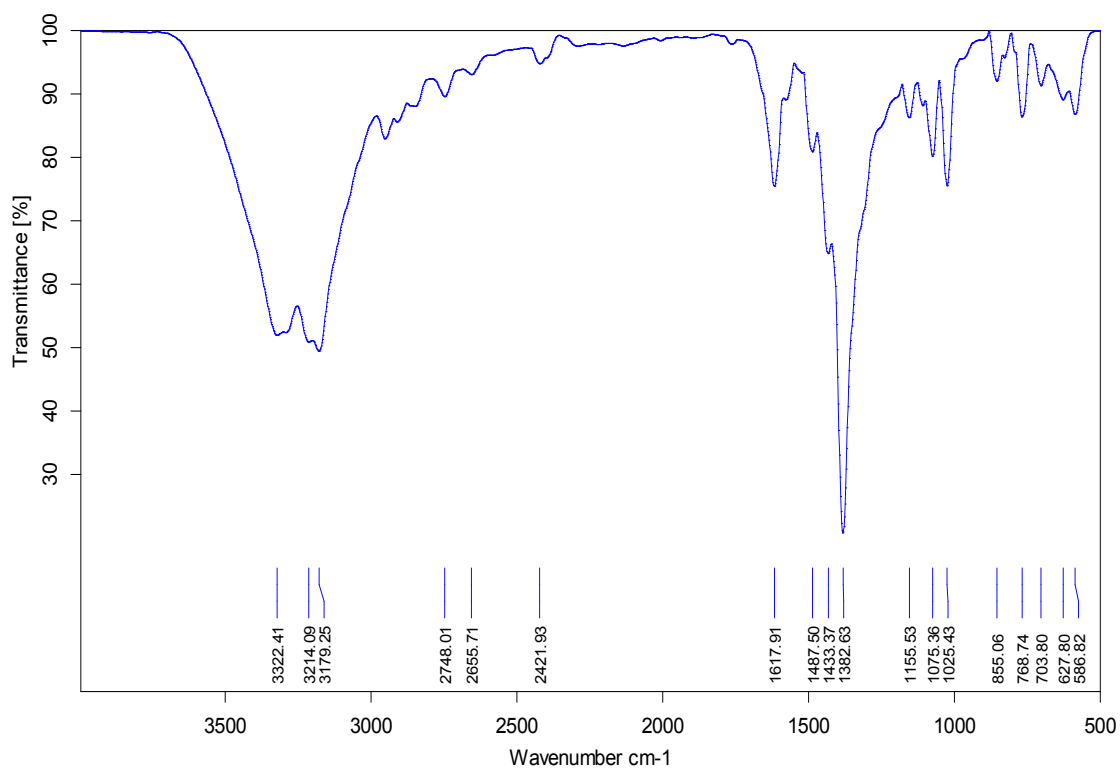

**Fig. S6** IR spectra of [2](NO<sub>3</sub>)<sub>2</sub> (Orange crystals) in KBr disk.

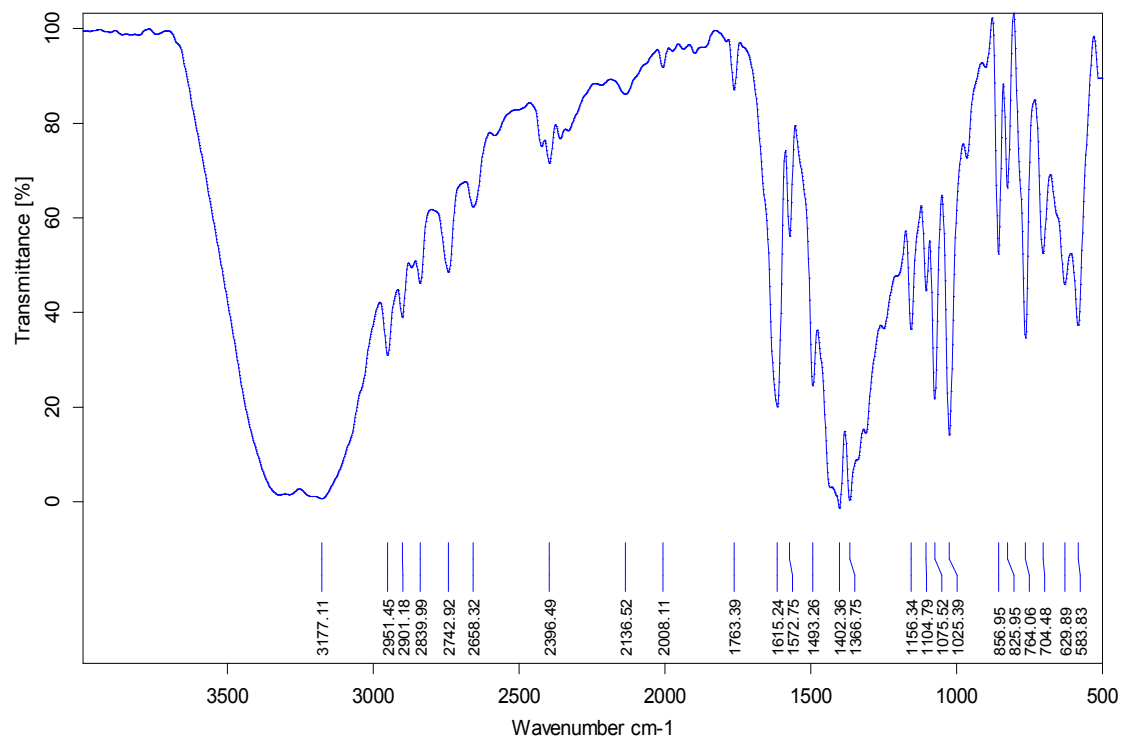

**Fig. S7** IR spectra of [4]NO<sub>3</sub>(Orange crystals) in KBr disk.



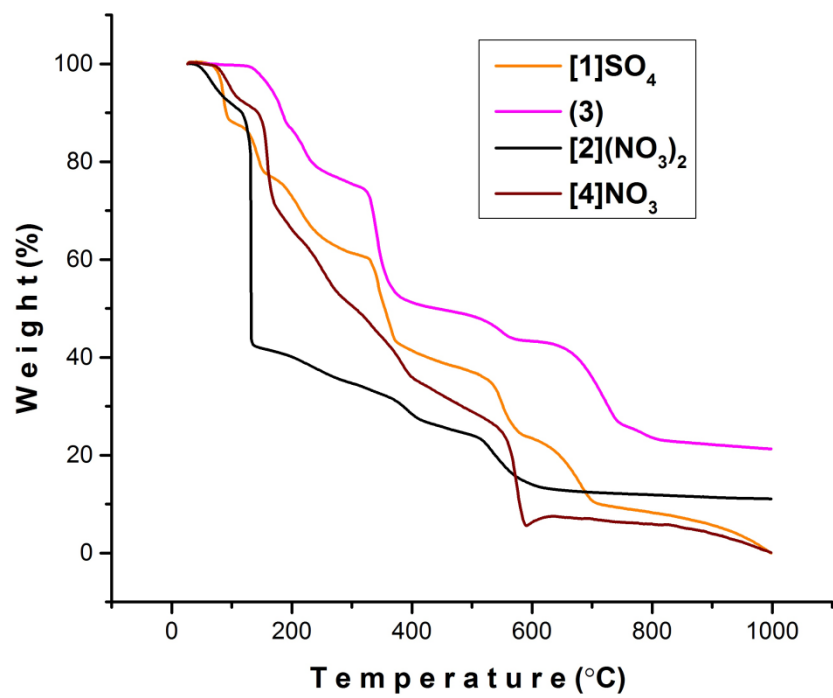

Fig. S8 TGA analysis of [1]SO<sub>4</sub>/(3) / [2](NO<sub>3</sub>)<sub>2</sub> / [4]NO<sub>3</sub>.

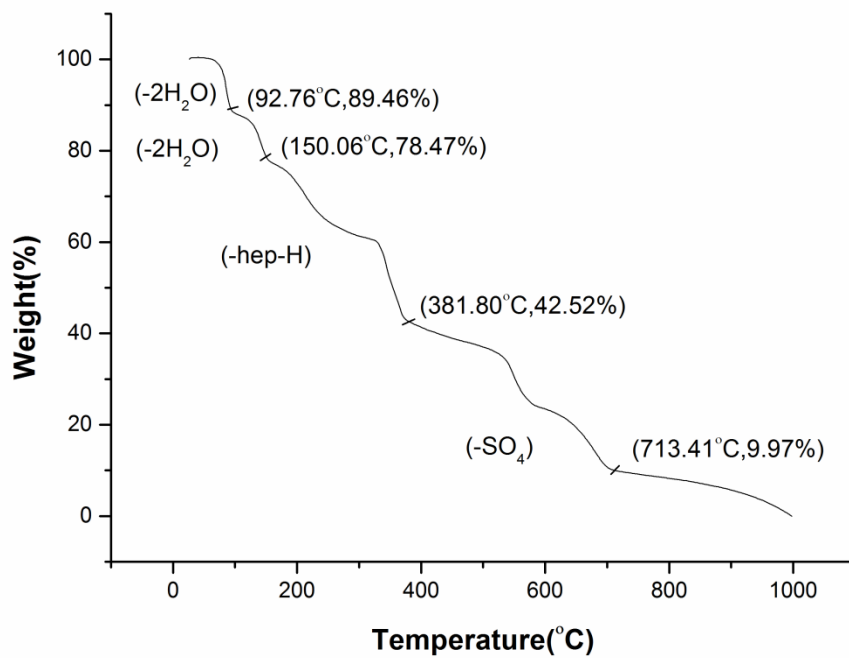

**Fig. S9** TGA of [1]SO<sub>4</sub>(Orange crystals).

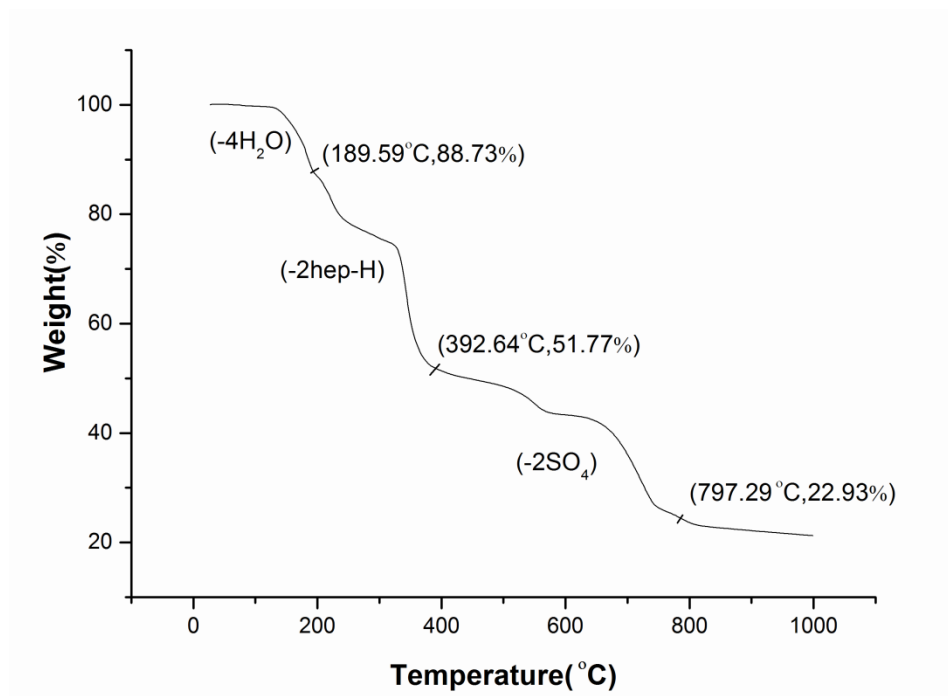

**Fig. S10** TGA of **3**(Pink crystals).

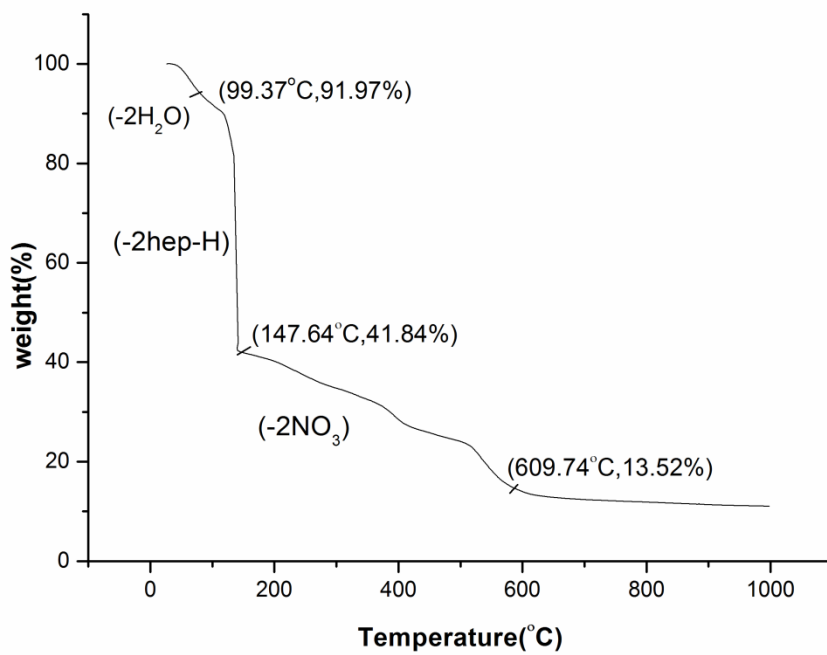

**Fig. S11** TGA of [2](NO<sub>3</sub>)<sub>2</sub>(Orange crystals).

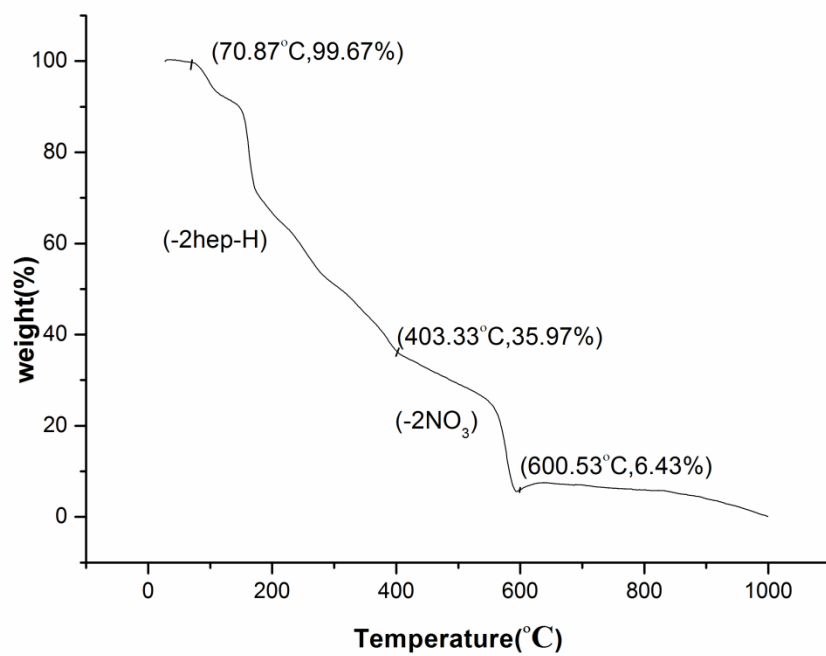

**Fig. S12** TGA of [4]NO<sub>3</sub>(Orange crystals).

(a)

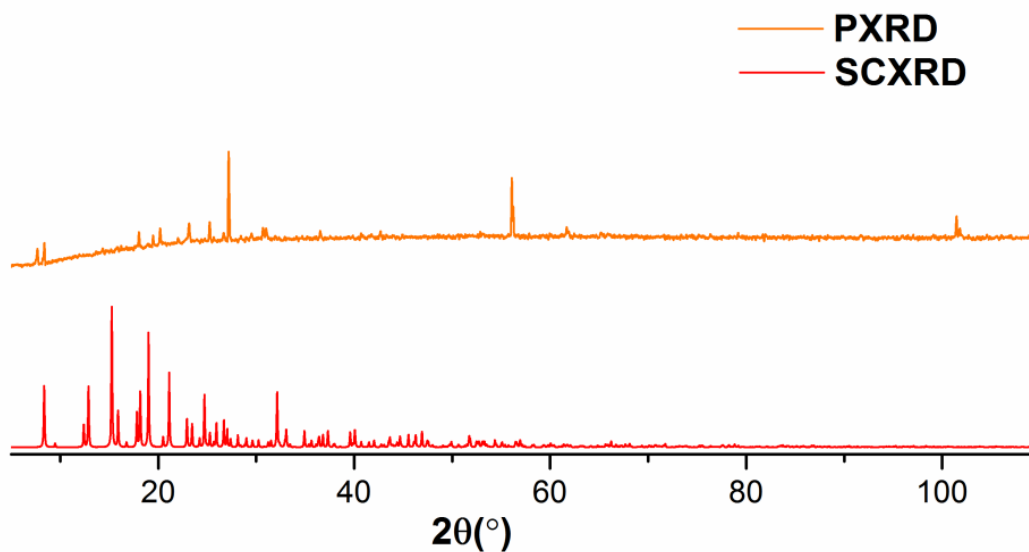

(b)

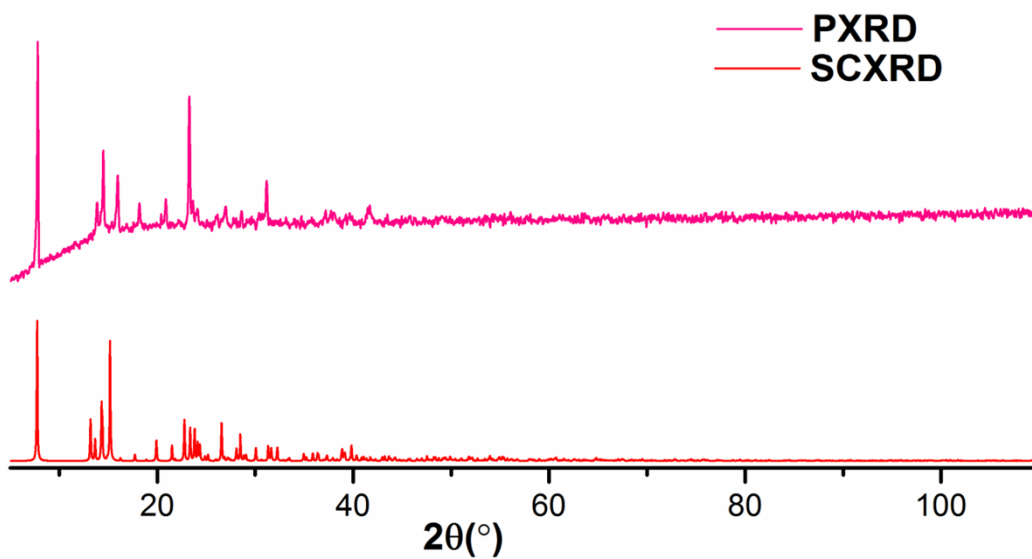

**Fig. S13 (a)** PXR D pattern of [1]SO<sub>4</sub>(Orange crystals)(Orange colour) and simulated SCXR D pattern of [1]SO<sub>4</sub>(Orange crystal)(Red colour).

**(b)**PXR D pattern of 3(Pink crystals) (Pink colour)and simulated SCXR D pattern of 3 (Pink crystal)(Red colour).

(a)

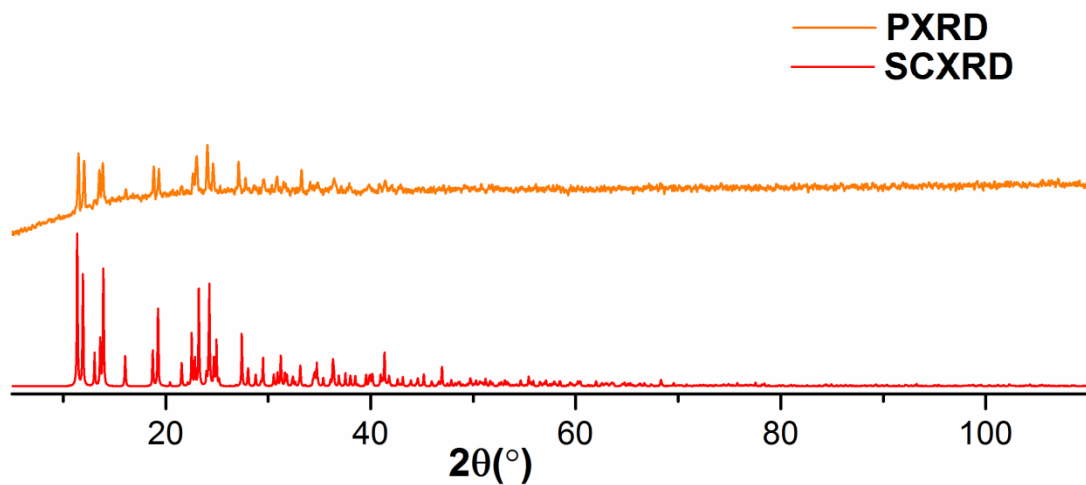

(b)

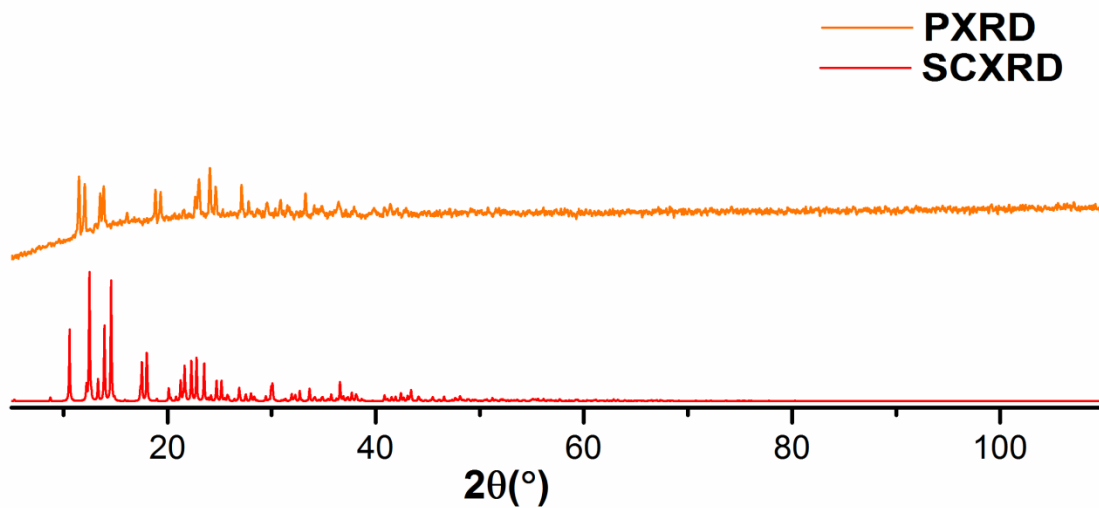

**Fig. 14 (a)** PXR D pattern of [2](NO<sub>3</sub>)<sub>2</sub> (Orange crystals)(Orange colour) and simulated SCXR D pattern of [2](NO<sub>3</sub>)<sub>2</sub> (Orange crystal)(Red colour).

**(b)** PXR D pattern of [4]NO<sub>3</sub> (Orange crystals)(Orange colour) and simulated SCXR D pattern of [4]NO<sub>3</sub> (Orange crystal)(Red colour).

**Note**

The PXRD for [1]SO<sub>4</sub>/3/[2](NO<sub>3</sub>)<sub>2</sub>/[4]NO<sub>3</sub> were performed on bulk single crystals as we could not able to generate polycrystalline or powder samples for the same, thus some shifts are observed in PXRD patterns.



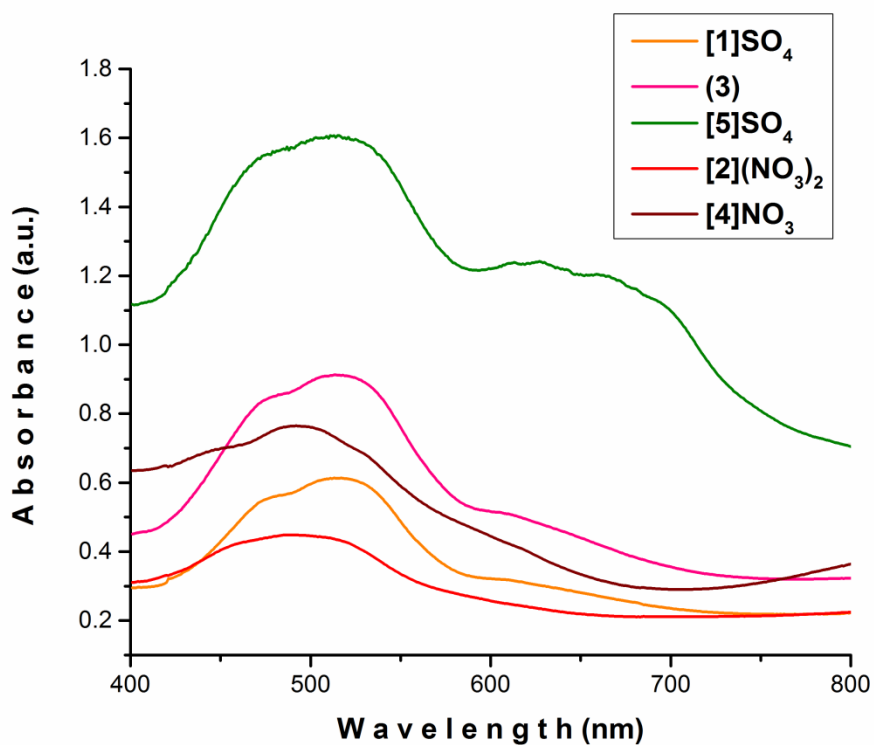

**Fig. S15** Solid state UV-vis pattern of [1]SO<sub>4</sub>/3/[5]SO<sub>4</sub>/[2](NO<sub>3</sub>)<sub>2</sub>/[4]NO<sub>3</sub>.

The UV-Vis analysis shows the optical band gap of [1]SO<sub>4</sub>/3/[5]SO<sub>4</sub>/[2](NO<sub>3</sub>)<sub>2</sub>/[4]NO<sub>3</sub>, was found to be 1.79, 1.56, 1.44, 1.94 and 1.76 eV respectively.
